# Supplementary material
Source: Springer Nature journal article supplement (https://www.springermedizin.de/resource/supplementary/12936_2013_3028_MOESM1_ESM.pdf/9544880)

**A**

|                     | <b>PCR positive<br/>(%)</b> | <b>PCR negative<br/>(%)</b> | <b>Total (%)</b> |
|---------------------|-----------------------------|-----------------------------|------------------|
| Microscopy positive | 214 (73.3)                  | 16 (5.5)                    | 230 (78.8)       |
| Microscopy negative | 27 (9.2)                    | 35 (12.0)                   | 62 (21.2)        |
| Total               | 241 (82.5)                  | 51 (17.5)                   | 292 (100.0)      |

**B**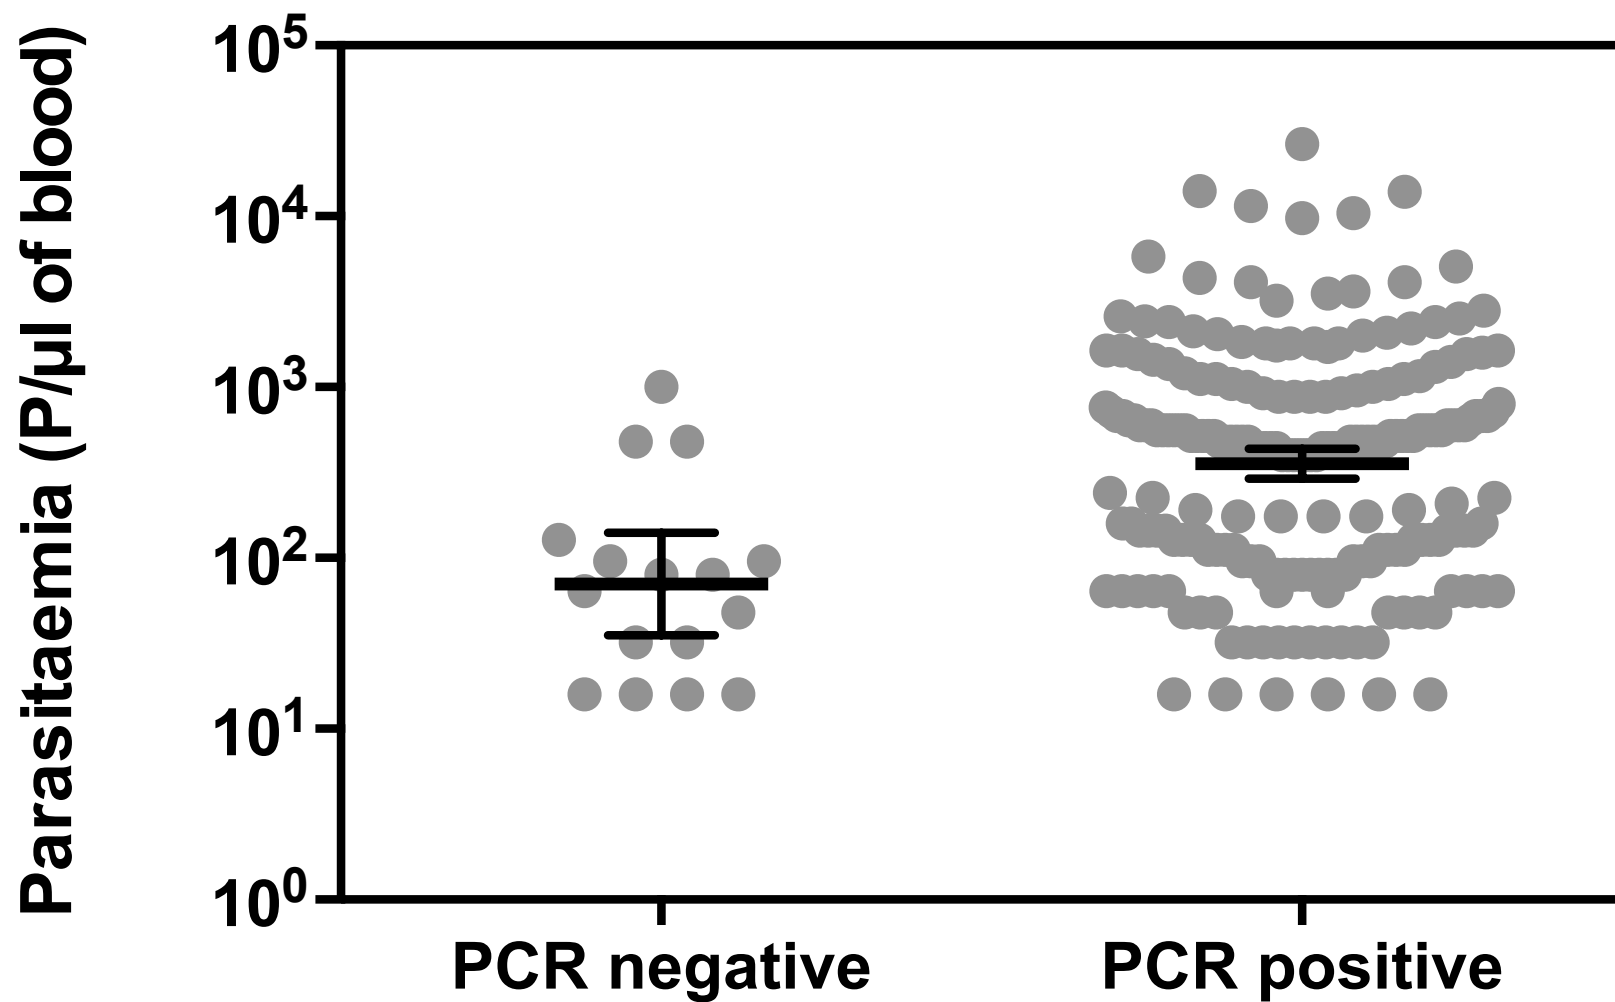

Supplement: MOESM1 [file 9544880]
